# Supplementary material for: Glacial vicariance drives phylogeographic diversification in the amphi-boreal kelp Saccharina latissima
Source: PubMed Central journal article supplement (PMC5773594; doi:10.1038/s41598-018-19620-7), 2018-01-18
Supplement: 41598_2018_19620_MOESM1_ESM.pdf [file 41598_2018_19620_MOESM1_ESM.pdf]

# SUPPLEMENTARY FILES

Glacial vicariance drives incipient speciation in the amphi-boreal kelp *Saccharina latissima*

João Neiva, Cristina Paulino, Mette M. Nielsen, Dorte Krause-Jensen, Gary W. Saunders, Jorge Assis, Ignacio Bárbara, Éric Tamigneaux, Lúcia Gouveia, Tânia Aires, Núria Marbà, Annette Bruhn, Gareth A. Pearson, Ester A. Serrão

**Table S1. Published sources of mtCOI sequences of *Saccharina* spp. used in the phylogenetic analyses.** Original species designations (<sup>a</sup> Genbank, <sup>b</sup> Journals), accession numbers, geographical origins and bibliographical sources are provided for each recovered genetic entity.

| Putative species                        | Deposited <sup>a</sup> /published <sup>b</sup> as                | Genbank accession(s)                                                                                                                                          | Geographic origin                                                                      | Source                        |             |
|-----------------------------------------|------------------------------------------------------------------|---------------------------------------------------------------------------------------------------------------------------------------------------------------|----------------------------------------------------------------------------------------|-------------------------------|-------------|
| <i>S. sculpera</i>                      | <i>S. sculpera</i> / <i>Kjellmaniella crassifolia</i>            | NC_029206   KR350664                                                                                                                                          | NW Pacific: unspecified                                                                | 1                             |             |
| <i>S. angustata</i>                     | <i>S. angustata</i>                                              | NC_013473   AP011498                                                                                                                                          | NW Pacific: Japan (Hokkaido)                                                           | 2                             |             |
| <i>S. japonica</i>                      | <i>S. japonica</i>                                               | NC_013476   AP011493                                                                                                                                          | NW Pacific: Japan (Hokkaido)                                                           | 2                             |             |
|                                         | <i>S. religiosa</i> / <i>S. japonica</i> var. <i>religiosa</i>   | NC_013477   AP011494                                                                                                                                          |                                                                                        |                               |             |
|                                         | <i>S. ochotensis</i> / <i>S. japonica</i> var. <i>ochotensis</i> | NC_013478   AP011495                                                                                                                                          |                                                                                        |                               |             |
|                                         | <i>S. diabolica</i> / <i>S. japonica</i> var. <i>diabolica</i>   | NC_013482   AP011496                                                                                                                                          |                                                                                        |                               |             |
|                                         | <i>S. longipedalis</i>                                           | NC_013484   AP011497                                                                                                                                          |                                                                                        |                               |             |
|                                         | <i>S. longissima</i>                                             | NC_021640   JN099684                                                                                                                                          |                                                                                        | 3                             |             |
|                                         | <i>Saccharina</i> sp. ye-C5                                      | KT336421                                                                                                                                                      |                                                                                        | 4                             |             |
|                                         | <i>Saccharina</i> sp. ye-F                                       | KP058499                                                                                                                                                      |                                                                                        | 5                             |             |
|                                         | <i>Saccharina</i> sp. ye-G                                       | KM657964                                                                                                                                                      |                                                                                        | 6                             |             |
|                                         | <i>Saccharina</i> sp. ye-W                                       | KR056087                                                                                                                                                      |                                                                                        | 7                             |             |
|                                         | <i>Saccharina japonica</i> , incl. var. <i>longipes</i>          | JN873222-JN873238 (17)                                                                                                                                        |                                                                                        | NW Pacific: Russia (Primorsk) | 8           |
|                                         | <i>Saccharina</i> sp. ye-C2-2/ <i>S. sp. ye-C2</i>               | KT336420                                                                                                                                                      |                                                                                        | NW Pacific: China (Liaoning)  | 9           |
|                                         | <i>Saccharina</i> sp. ye-C12                                     | NC_028211   KT428594                                                                                                                                          |                                                                                        | NW Pacific: China (Qingdao)   | 10          |
|                                         | <i>Saccharina</i> sp. ye-C6                                      | KT271760                                                                                                                                                      |                                                                                        | NW Pacific: unspecified       | 11          |
|                                         | <i>Saccharina</i> sp. ye-B                                       | NC_028192   KT356873                                                                                                                                          |                                                                                        | unspecified                   | unpublished |
| <i>S. japonica</i>                      | AB775228                                                         | NW Pacific: unspecified                                                                                                                                       | 12                                                                                     |                               |             |
| <i>S. japonica</i> , incl. varieties    | KT963115-KT963144 (30)                                           | NW Pacific: Russia (Sakhalin) to China (Shandong)                                                                                                             | 13                                                                                     |                               |             |
| <i>S. nigripes</i>                      | <i>S. groenlandica</i> / <i>S. bongardiana</i>                   | FJ409194-FJ409198 (5)                                                                                                                                         | NE Pacific: Canada (B. Columbia)                                                       | 14                            |             |
|                                         | <i>S. groenlandica</i>                                           | GU097731-GU097749 (19)                                                                                                                                        | NE Pacific: Canada (B. Columbia); NW Atlantic: Canada (Hudson Bay, Canadian Maritimes) | 15                            |             |
| <i>S. bongardiana</i>                   | <i>S. bongardiana</i>                                            | GU097727-GU097730 (4)                                                                                                                                         | NW Pacific: Russia (Kamchatka)                                                         | 15                            |             |
| <i>S. druehlii</i>                      | <i>Saccharina</i> sp. GWS-2014/ <i>S. druehlii</i>               | KJ960273                                                                                                                                                      | NE Pacific: Canada (British Columbia)                                                  | 16                            |             |
| <i>S. sessilis</i>                      | <i>S. sessilis</i>                                               | KJ960277, KJ960268, KJ960263, KJ960250, KJ960241 (5)                                                                                                          | NE Pacific: Canada (British Columbia)                                                  | 16                            |             |
|                                         |                                                                  | FJ409205-FJ409208 (4)                                                                                                                                         |                                                                                        | 14                            |             |
|                                         |                                                                  | GU097833-GU097834 (2)                                                                                                                                         |                                                                                        | 15                            |             |
|                                         |                                                                  | EF218846                                                                                                                                                      |                                                                                        | 17                            |             |
| <i>S. latissima</i> A                   | <i>S. coriácea</i>                                               | NC_013475   AP011499                                                                                                                                          | NW Pacific: Japan (Hokkaido)                                                           | 2                             |             |
|                                         | <i>S. latissima</i>                                              | LT546291                                                                                                                                                      | NW Atlantic: Canada (northern Baffin Island)                                           | 18                            |             |
|                                         | <i>S. latissima</i> (Pacific mitotype)                           | FJ409199-FJ409204 (6)<br>GU097754-GU097760, GU097762, GU097787, GU097789, GU097790, GU097792, GU097793, GU097797, GU097800, GU097812, GU097816, GU097819 (18) | NE Pacific: Canada (B. Columbia); NW Atlantic: Canada (Hudson Bay)                     | 15                            |             |
| <i>S. latissima</i> B                   | <i>S. latissima</i> strain ye-C14                                | NC_026108   KM675818                                                                                                                                          | NE Atlantic: Germany                                                                   | 19                            |             |
|                                         | <i>S. latissima</i>                                              | EU681420                                                                                                                                                      | NE Atlantic: France                                                                    | 20                            |             |
|                                         |                                                                  | LN877849                                                                                                                                                      | NE Atlantic: Norway                                                                    | unpublished                   |             |
| <i>S. latissima</i> (European mitotype) | GU097750-53, GU097786, GU097803 (6)                              | NE Atlantic: Ireland, Faroes                                                                                                                                  | 15                                                                                     |                               |             |
| <i>S. latissima</i> C                   | <i>S. latissima</i> (Atlantic mitotype)                          | GU097761, GU097763-85, GU097788, GU097791, GU097794-96, GU097798-99, GU097801, GU097802, GU097804-GU097811, GU097813-15, GU097817, GU097818, GU097820-32 (59) | NW Atlantic: USA (Northeast), Canada (Canadian Maritimes, Labrador, Hudson Bay)        | 15                            |             |
| <i>S. latissima</i> D                   | <i>Saccharina</i> sp. ye-C                                       | KT315643                                                                                                                                                      | NW Pacific?                                                                            | unpublished                   |             |
|                                         | <i>S. cichorioides</i>                                           | JN873239-JN873246; JQ792007-JQ792010 (12)                                                                                                                     | NW Pacific: Russia (Primorsk)                                                          | 8                             |             |

1. Zhang, L. *et al.* Complete mitochondrial genome of *Kjellmaniella crassifolia* (Laminariaceae , Phaeophyceae): *Laminaria* and *Saccharina* are distinct genus. *Mitochondrial DNA Part A* **27**, 4592-4594 (2016).
2. Yotsukura, N., Shimizu, T., Katayama, T. & Druehl, L. D. Mitochondrial DNA sequence variation of four *Saccharina* species (Laminariales, Phaeophyceae) growing in Japan. *J. Appl. Phycol.* **22**, 243–251 (2009).
3. Zhang, J., Wang, X., Liu, C., Jin, Y. & Liu, T. The complete mitochondrial genomes of two brown algae ( Laminariales , Phaeophyceae ) and phylogenetic analysis within *Laminaria*. *J. Appl. Phycol.* **25**, 1247–1253 (2013).
4. Fan, X. *et al.* Sequencing of complete mitochondrial genome of brown algal *Saccharina* sp . ye-C5. *Mitochondrial DNA Part B* **1**, 14–15 (2016).
5. Fan, X. *et al.* Sequencing of complete mitochondrial genome of brown algal *Saccharina* sp . ye-F. *Mitochondrial DNA Part A* **27**, 3693–3694 (2016).
6. Guan, Z. *et al.* Sequencing of complete mitochondrial genome of brown algal *Saccharina* sp . ye-G. *Mitochondrial DNA Part A* **27**, 2125–2126 (2016).
7. Wang, S. *et al.* Sequencing of complete mitochondrial genome of brown algal *Saccharina* sp . ye-W. *Mitochondrial DNA Part A* **27**, 3026–3027 (2016).
8. Balakirev, E. S., Krupnova, T. N. & Ayala, F. J. DNA variation in the phenotypically-diverse brown alga *Saccharina japonica*. *BMC Plant Biol.* **12**, 108 (2012).
9. Fan, X. *et al.* Sequencing of complete mitochondrial genome of brown algal *Saccharina* sp . ye-C2. *Mitochondrial DNA Part B* **1**, 16–17 (2016).
10. Xu, D. *et al.* Sequencing of complete mitochondrial genome of brown algal *Saccharina* sp. ye- C12. *Mitochondrial DNA Part B* **1**, 62-63 (2016).
11. Xu, L. *et al.* Sequencing of complete mitochondrial genome of brown algal *Saccharina* sp . ye-C6. *Mitochondrial DNA Part A* **27**, 3733–3734 (2016).
12. Kawai, H., Hanyuda, T., Ridgway, L. M. & Holser, K. Ancestral reproductive structure in basal kelp *Aureophycus aleuticus*. *Sci. Rep.* **3**, 2491 (2013).
13. Zhang, J. *et al.* Phylogeographic data revealed shallow genetic structure in the kelp *Saccharina japonica* (Laminariales, Phaeophyta). *BMC Evol. Biol.* **15**, 237 (2015).
14. McDevit, D. C. & Saunders, G. W. On the utility of DNA barcoding for species differentiation among brown macroalgae (Phaeophyceae) including a novel extraction protocol. *Phycol. Res.* **57**, 131–141 (2009).
15. McDevit, D. C. & Saunders, G. W. A DNA barcode examination of the Laminariaceae (Phaeophyceae) in Canada reveals novel biogeographical and evolutionary insights. *Phycologia* **49**, 235–248 (2010).
16. Saunders, G. W. & McDevit, D. C. A DNA barcode survey of Haida Gwaii kelp (Laminariales , Phaeophyceae) reveals novel ecological and distributional observations and *Saccharina druehlii* sp. nov. *Botany* **92**, 821–826 (2014).
17. Lane, C. E., Lindstrom, S. C. & Saunders, G. W. A molecular assessment of northeast Pacific *Alaria* species (Laminariales, Phaeophyceae) with reference to the utility of DNA barcoding. *Mol. Phylogenet. Evol.* **44**, 634–48 (2007).
18. Küpper, F. C. *et al.* Arctic marine phytobenthos of northern Baffin Island. *J. Phycol.* **52**, 532-49 (2016).
19. Wang, S. *et al.* Sequencing of complete mitochondrial genome of *Saccharina latissima* ye-C14. *Mitochondrial DNA Part A* **27**, 4037-38 (2016).
20. Silberfeld, T. *et al.* A multi-locus time-calibrated phylogeny of the brown algae (Heterokonta, Ochrophyta, Phaeophyceae): Investigating the evolutionary nature of the ‘brown algal crown radiation’. *Mol. Phylogenet. Evol.* **56**, 659–74 (2010).

**Table S2. Intra- and interspecific COI divergence in *Saccharina* spp.** Ranges (min-max) of estimated K2P distances within (grey diagonal) and between *Saccharina* spp. (top), and within (grey diagonal) and between phylogroups of *S. latissima* s. l. (bottom).

|                          | sculpera (1)            | angustata (1)          | japonica (10)           | bongardiana (3)        | nigripes (6)             | druheli (1) | sessilis (8)     | latissima sl (32)        |
|--------------------------|-------------------------|------------------------|-------------------------|------------------------|--------------------------|-------------|------------------|--------------------------|
| <i>S. sculpera</i>       | NA                      |                        |                         |                        |                          |             |                  |                          |
| <i>S. angustata</i>      | 5.56                    | NA                     |                         |                        |                          |             |                  |                          |
| <i>S. japonica</i>       | 5.73-6.23               | 4.42-4.91              | <b>0.15-0.77</b>        |                        |                          |             |                  |                          |
| <i>S. bongardiana</i>    | 5.40-5.73               | 5.75-5.91              | 6.40-7.26               | <b>0.15-0.30</b>       |                          |             |                  |                          |
| <i>S. nigripes</i>       | 5.23-5.71               | 5.09-5.57              | 5.74-7.08               | 2.01-2.80 (3.27)*      | <b>0.15-0.46 (1.07)*</b> |             |                  |                          |
| <i>S. druheli</i>        | 4.57                    | 5.40                   | 5.06-5.56               | 2.64-2.96              | 2.16-2.48 (2.95)*        | NA          |                  |                          |
| <i>S. sessilis</i>       | 5.40-6.07               | 5.56-6.24              | 5.89-6.74               | 3.60-4.08              | 2.96-3.60 (4.08)*        | 1.70-2.01   | <b>0.15-0.77</b> |                          |
| <i>S. latissima</i> s.l. | 4.74-5.56               | 5.25-6.43              | 4.56 (4.74)*-6.06       | 5.22-6.74              | 4.74-6.24 (6.73)*        | 4.72-5.55   | 6.22-7.41        | <b>0.15-1.54* (1.70)</b> |
|                          | <b>latissima A (10)</b> | <b>latissima B (9)</b> | <b>latissima C (10)</b> | <b>latissima D (3)</b> |                          |             |                  |                          |
| <i>S. latissima</i> A    | 0.15-0.61* (0.92)       |                        |                         |                        |                          |             |                  |                          |
| <i>S. latissima</i> B    | 0.76-1.38* (1.54)       | 0.15-0.61* (0.92)      |                         |                        |                          |             |                  |                          |
| <i>S. latissima</i> C    | 0.92-1.54* (1.69)       | 0.76-1.38* (1.70)      | 0.15-0.46               |                        |                          |             |                  |                          |
| <i>S. latissima</i> D    | 0.61-1.07* (1.23)       | 0.76-1.23* (1.38)      | 0.92-1.38               | 0.15-0.46              |                          |             |                  |                          |

\*after removing 4 sequences (1 *S. nigripes*, 2 *S. latissima* A, 1 *S. latissima* B) with clustered mutations suggesting low quality sequenced regions (i.e. artefacts)

**Table S3. Posterior distributions (mean and quantiles) of the demographic and mutation model parameters in the first hierarchical scenario.**

| Parameter                | Mean               | q(0.05)            | q(0.95)            |
|--------------------------|--------------------|--------------------|--------------------|
| t <sub>1</sub> (pre-LGM) | 8.97e <sup>4</sup> | 6.93e <sup>4</sup> | 2.93e <sup>5</sup> |
| t <sub>2</sub> (pre-LGM) | 1.97e <sup>5</sup> | 2.70e <sup>4</sup> | 4.69e <sup>5</sup> |
| μ <sub>mic</sub>         | 1.20e-4            | 1.00e-4            | 2.24e-4            |
| P                        | 1.93e-1            | 1.04e-1            | 2.92e-1            |
| SNI                      | 1.76e-7            | 1.06e-8            | 1.11e-6            |

μ<sub>mic</sub>: mean mutation rate; P: shape of gamma distribution in loci mutation rate; SNI: rate of Single Nucleotide Insertion) inferred in the first hierarchical level of the ABC analyses.

**Table S4. Posterior distributions (mean and quantiles) of the demographic and mutation model parameters in the second hierarchical scenario.**

| Parameter                  | Mean               | q(0.05)            | q(0.95)             |
|----------------------------|--------------------|--------------------|---------------------|
| Admixture rate (RA)        | 1.77e-1            | 4.73e-2            | 3.99e-1             |
| t <sub>05</sub> (post-LGM) | 3.55e <sup>3</sup> | 7.39e <sup>2</sup> | 4.94e+ <sup>3</sup> |
| μ <sub>mic</sub>           | 1.97e-4            | 1.00e-4            | 2.55e-4             |
| P                          | 2.17e-1            | 1.04e-1            | 3.00e-1             |
| SNI                        | 3.67e-7            | 1.29e-8            | 2.51e-6             |

μ<sub>mic</sub>: mean mutation rate; P: shape of gamma distribution in loci mutation rate; SNI: rate of Single Nucleotide Insertion) inferred in the second hierarchical level of the ABC analyses.

**Table S5. Prior distributions for demographic and mutation parameters used in the first hierarchical level of the ABC analyses.** Category of parameters: (n) effective population size, (t) time in generations. Distribution of parameters as uniform (uni) and Log-Uniform (lu), both with a min and max. Mutation model parameters (ml; microsatellite loci) as mean mutation rate(μ<sub>mic</sub>), shape of gamma distribution in loci mutation rate (P) and rate of Single Nucleotide Insertion (SNI).

| Parameter                                 | Category | Distribution | Minimum              | Maximum              |
|-------------------------------------------|----------|--------------|----------------------|----------------------|
| Ancient pop. size                         | n        | uni          | 1000                 | 1000000              |
| Pacific pop. size at sampling (Pop 1)     | n        | uni          | 1000                 | 1000000              |
| NW Atlantic pop. size at sampling (Pop 2) | n        | uni          | 1000                 | 1000000              |
| NE Atlantic pop. size at sampling (Pop 3) | n        | uni          | 1000                 | 1000000              |
| t <sub>1</sub> (pre-LGM)                  | t        | uni          | 10000                | 1000000              |
| t <sub>2</sub> (pre-LGM)                  | t        | uni          | 10000                | 1000000              |
| t <sub>3</sub> (post-LGM)                 | t        | uni          | 10                   | 10000                |
| t <sub>4</sub> (post-LGM)                 | t        | uni          | 10                   | 10000                |
| μ <sub>mic</sub>                          | ml       | uni          | 1 x 10 <sup>-4</sup> | 1 x 10 <sup>-3</sup> |
| P                                         | ml       | uni          | 1 x 10 <sup>-1</sup> | 3 x 10 <sup>-1</sup> |
| SNI                                       | ml       | lu           | 1 x 10 <sup>-8</sup> | 1 x 10 <sup>-5</sup> |

**Table S6. Prior distributions for demographic and mutation parameters used in the second hierarchal level of the ABC analyses.** Category of parameters: (n) effective population size, (t) time in generations. Distribution of parameters as uniform (uni) and Log-Uniform (lu), both with a min and max. Mutation model parameters (ml; microsatellite loci) as mean mutation rate( $\mu_{mic}$ ), shape of gamma distribution in loci mutation rate (P) and rate of Single Nucleotide Insertion (SNI).

| Parameter                                 | Category | Distribution | Minimum            | Maximum            |
|-------------------------------------------|----------|--------------|--------------------|--------------------|
| Ancient pop. Size                         | n        | uni          | 1000               | 1000000            |
| Pacific pop. size at sampling (Pop 1)     | n        | uni          | 1000               | 1000000            |
| NW Atlantic pop. size at sampling (Pop 2) | n        | uni          | 1000               | 1000000            |
| Admix pop. size at sampling (Pop 3)       | n        | uni          | 1000               | 1000000            |
| NE Atlantic pop. size at sampling (Pop 4) | n        | uni          | 1000               | 1000000            |
| Admixture rate (RA)                       | r        | uni          | 0.001              | 0.999              |
| t <sub>1</sub> (pre-LGM)                  | t        | uni          | 10000              | 1000000            |
| t <sub>2</sub> (pre-LGM)                  | t        | uni          | 10000              | 1000000            |
| t <sub>05</sub> (post-LGM)                | t        | uni          | 10                 | 10000              |
| $\mu_{mic}$                               | ml       | uni          | $1 \times 10^{-4}$ | $1 \times 10^{-3}$ |
| P                                         | ml       | uni          | $1 \times 10^{-1}$ | $3 \times 10^{-1}$ |
| SNI                                       | ml       | lu           | $1 \times 10^{-8}$ | $1 \times 10^{-5}$ |

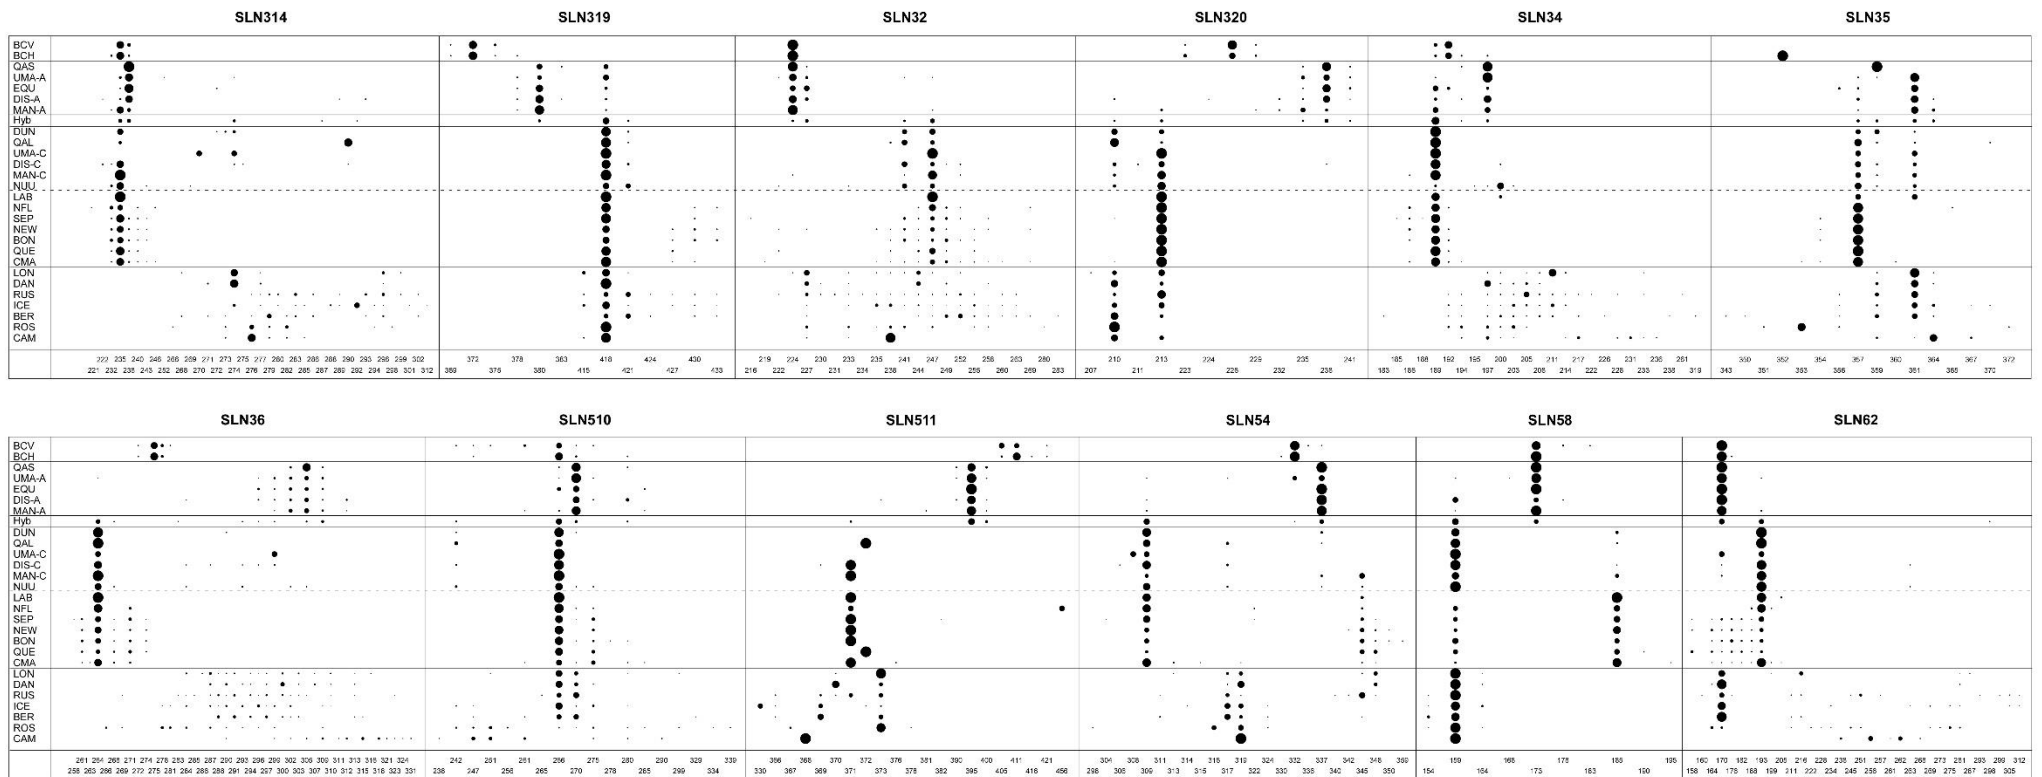

**Figure S1. Microsatellite allele frequencies in each genetic population of *Saccharina latissima* s.l.** The presence of an allele in a population is indicated by a circle with an area proportional to its frequency. Numbers on bottom are allele sizes (bp). Horizontal lines separate, for each genetic group, the geographical regions considered (see Table 1, also for population codes).

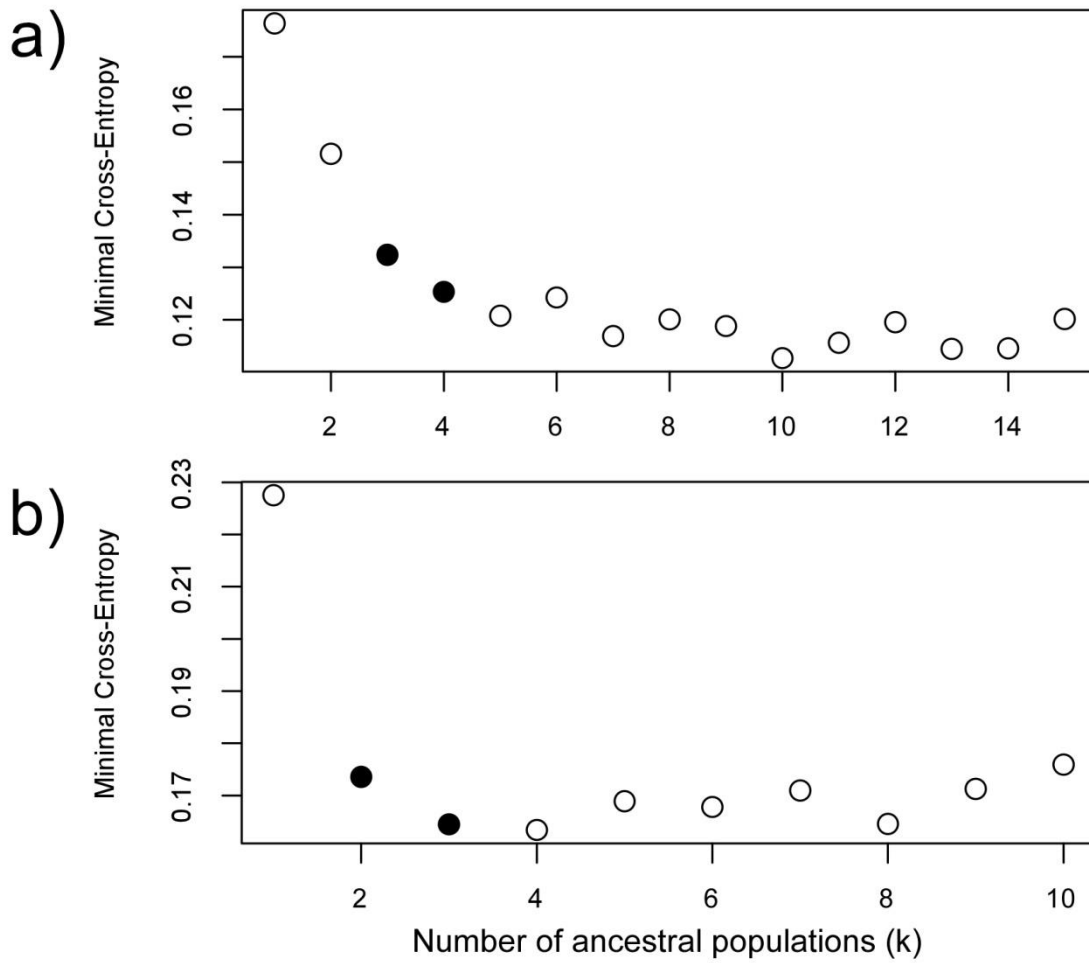

**Figure S2. Genetic subdivision of *S. latissima* according to LEA analyses.**

Inferred  $n^{\circ}$  of genotypic clusters in **a)** the entire sampled range (NE Pacific and N Atlantic) and **b)** the NW Atlantic sympatric range of A and C phylogroups. Twenty iterations were run for each number of genetic clusters assumed (K). The most probable Ks (filled symbols) were selected based on the stabilization of the Minimal Cross-Entropy curves.



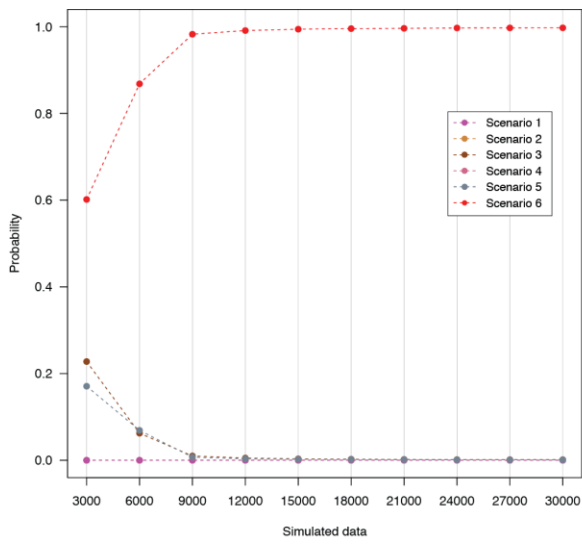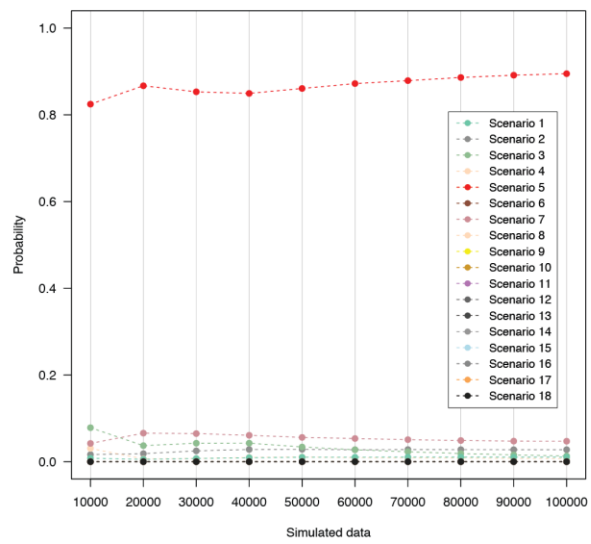

**Figure S3. Logistic regression of the posterior probabilities of the tested demographic scenarios.** Plots refer to the first (left) and second (right) hierarchical levels of ABC analyses, as a function of number of simulated datasets.

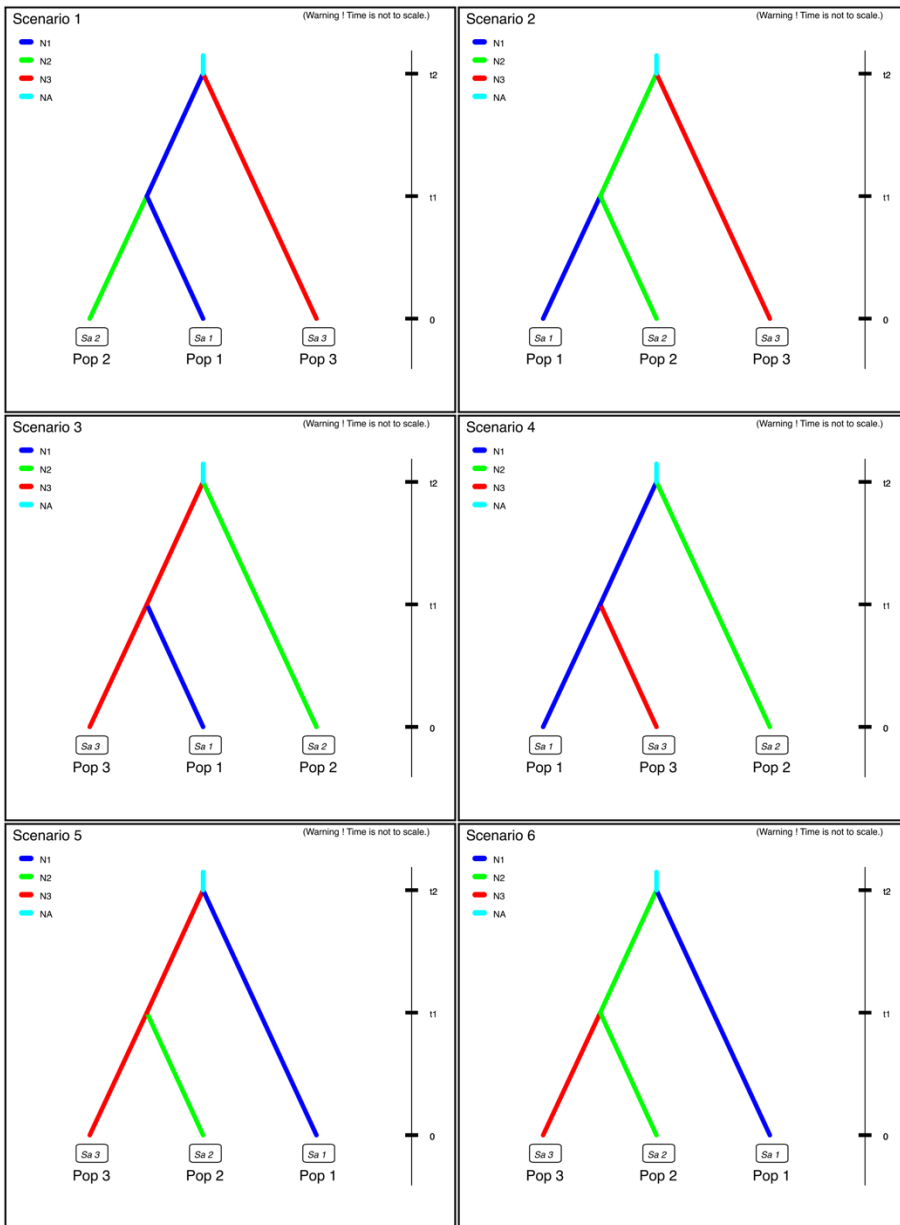

**Figure S4. Scenarios compared on the first hierarchal level of ABC analyses.** Three main regional (allopatric) populations of *S. latissima* were considered (Pop 1: Pacific (British Columbia), in blue; Pop 2: allopatric NW Atlantic, in green; Pop 3: NE Atlantic, in red). “A” represents the ancestral species.

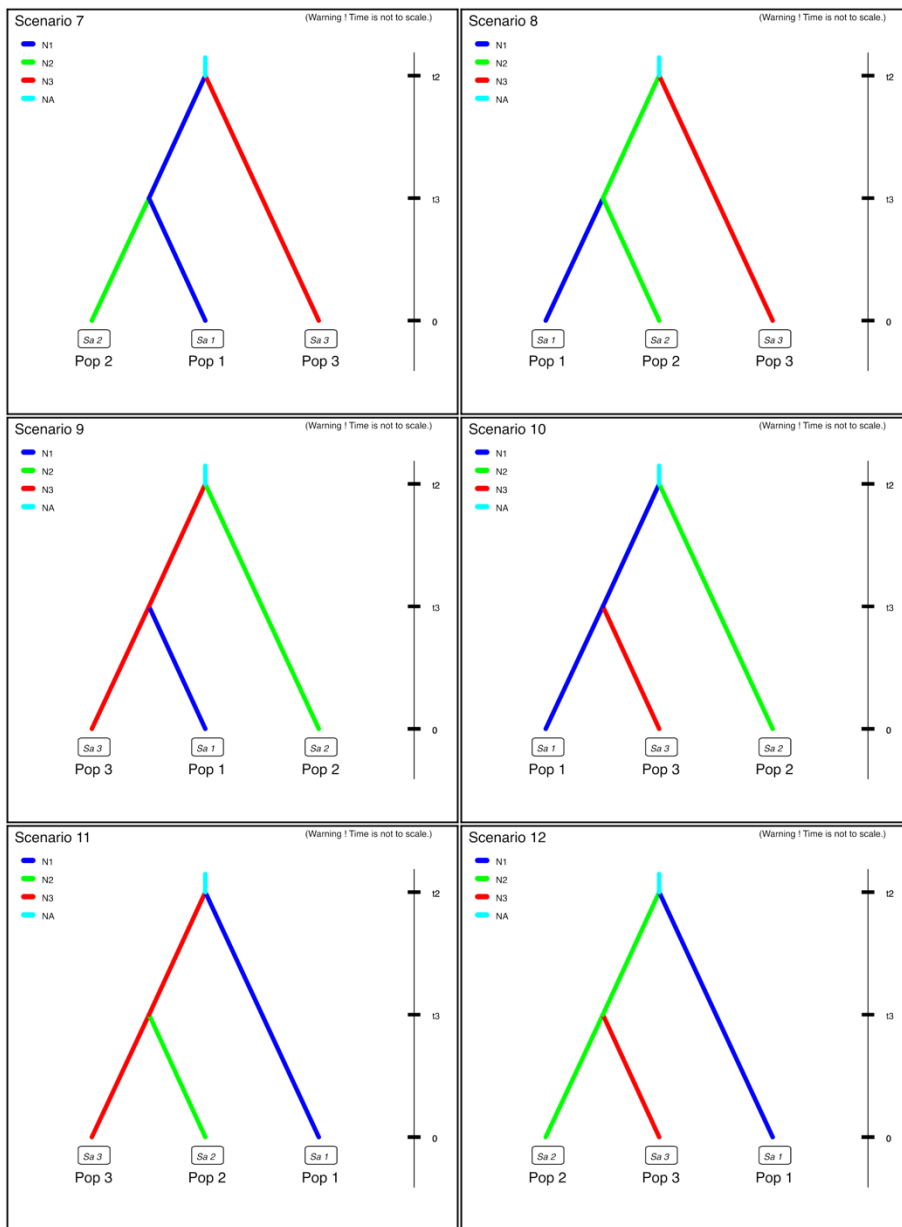

**Figure S4 (cont.).** Scenarios compared on the first hierarchal level of ABC analyses, performed on the three main populations of *S. latissima* (Pop 1: Pacific; Pop 2: NW Atlantic; Pop 3: NE Atlantic).

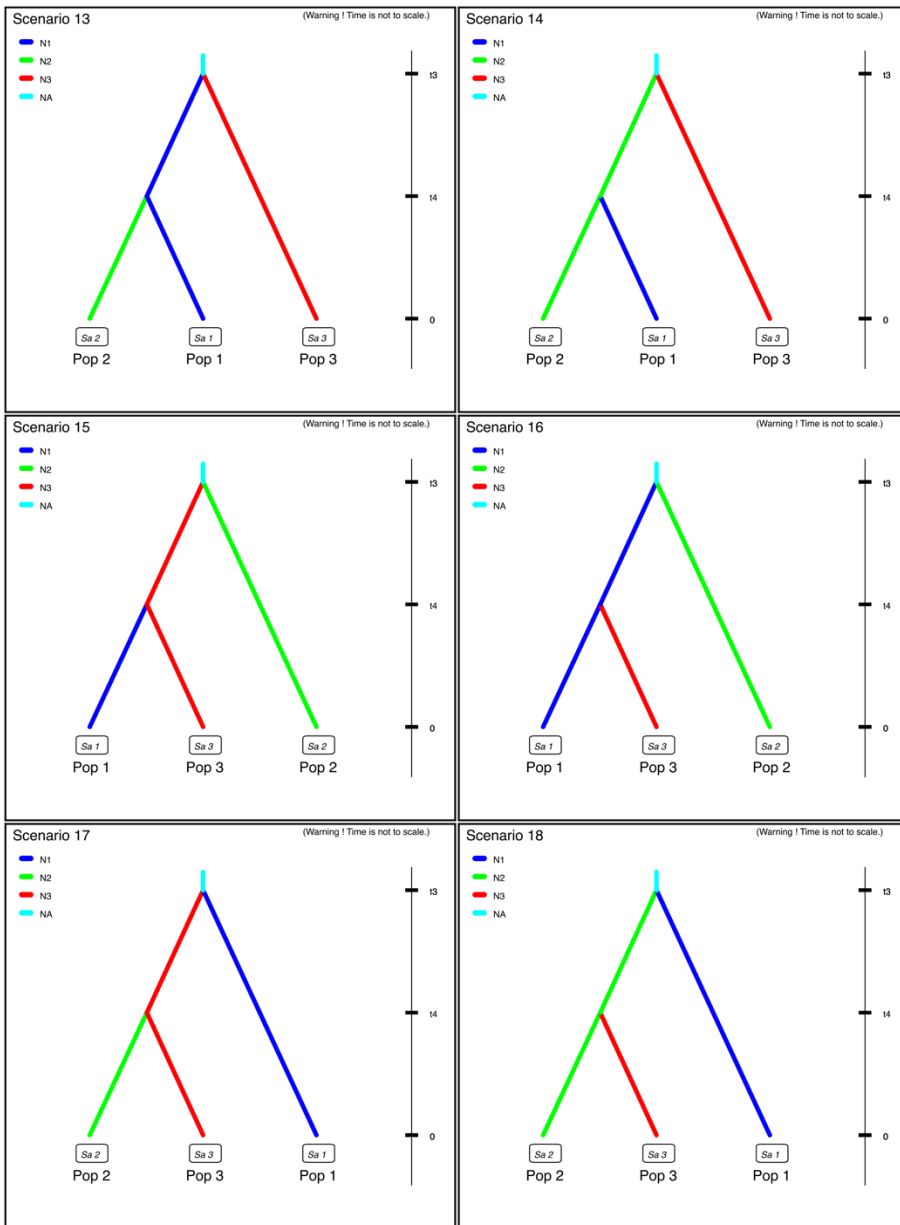

**Figure S4 (cont.).** Scenarios compared on the first hierarchal level of ABC analyses, performed on the three main populations of *S. latissima* (Pop 1: Pacific; Pop 2: NW Atlantic; Pop 3: NE Atlantic).

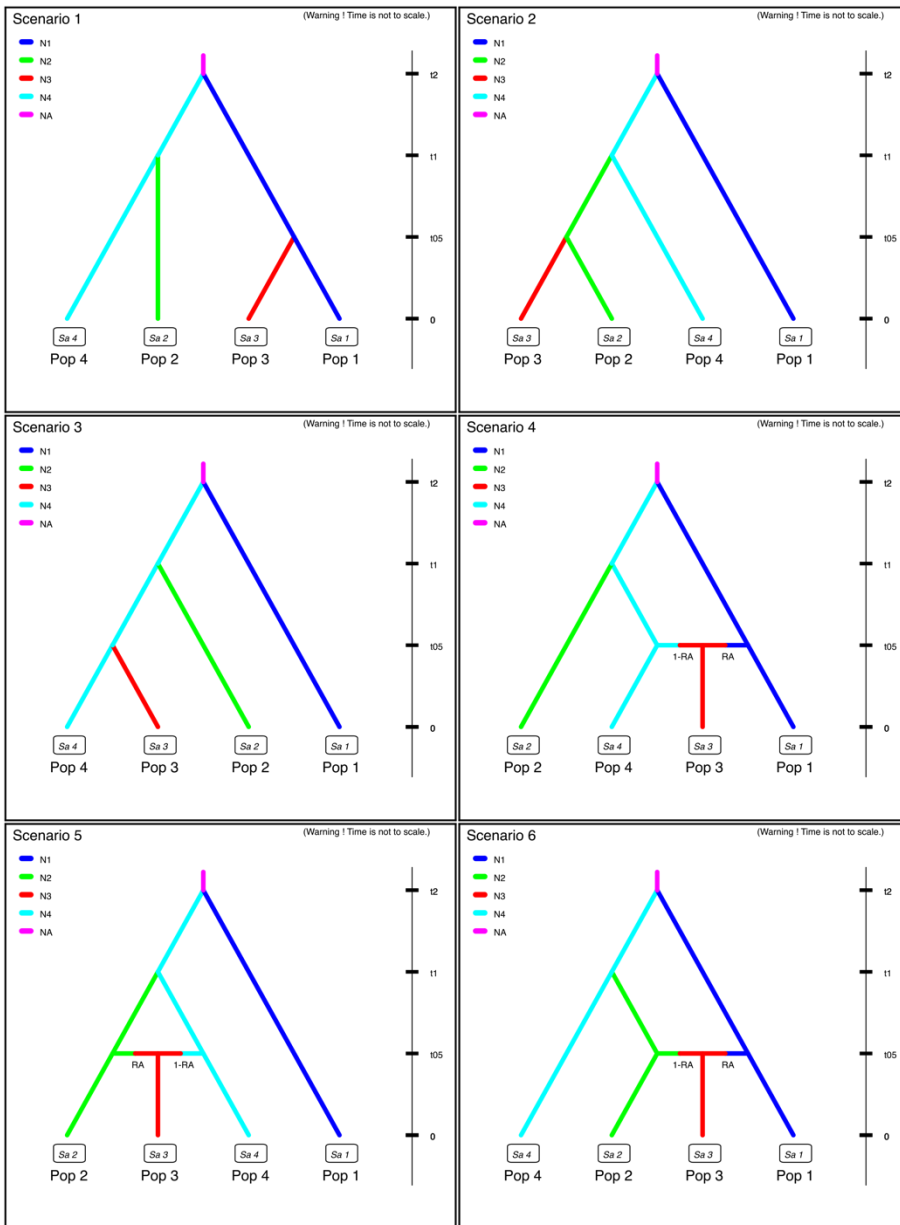

**Figure S5. Scenarios compared on the second hierarchical level of ABC analyses.** Four populations of *S. latissima* were considered (Pop 1: Pacific (British Columbia), in dark blue; Pop 2: allopatric NW Atlantic, in light green; Pop 3: sympatric NW Atlantic contact zone, in red; and Pop 4: NE Atlantic, in light blue). “A” represents the ancestral species.
